# Supplementary figures and images for: Quantitative Residue-Level Structure–Evolution Relationships in the Yeast Membrane Proteome
Source: PubMed Central journal article supplement — Genome Biol Evol. 2013 Mar 19;5(4):734–44. doi: 10.1093/gbe/evt039 (PMC3641637; doi:10.1093/gbe/evt039), 2013-03-19

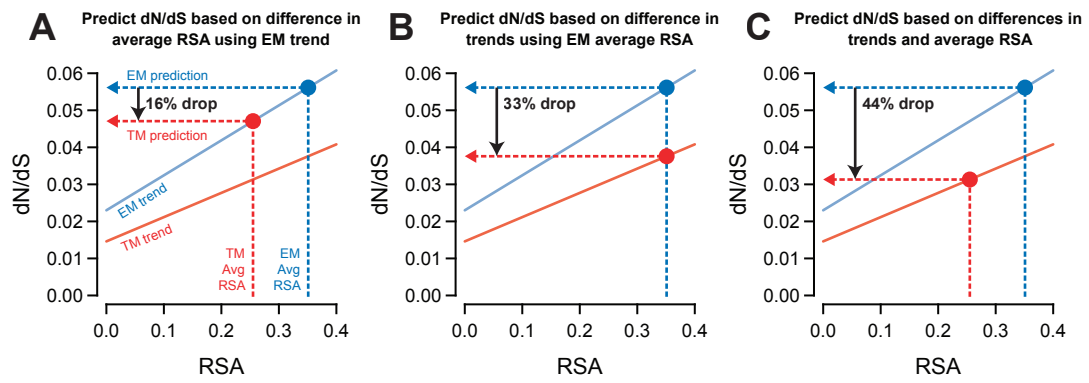

**Figure S2**

Supplement: supp_evt039_Figure_S2.pdf [file supp_evt039_Figure_S2.pdf]
